# Supplementary material
Source: bioRxiv or medRxiv preprint supplement (https://www.medrxiv.org/highwire/filestream/76029/field_highwire_adjunct_files/0/2020.04.06.20055020-1.pdf)
Supplement: Supplementary file [file 2020.04.06.20055020-1.pdf]

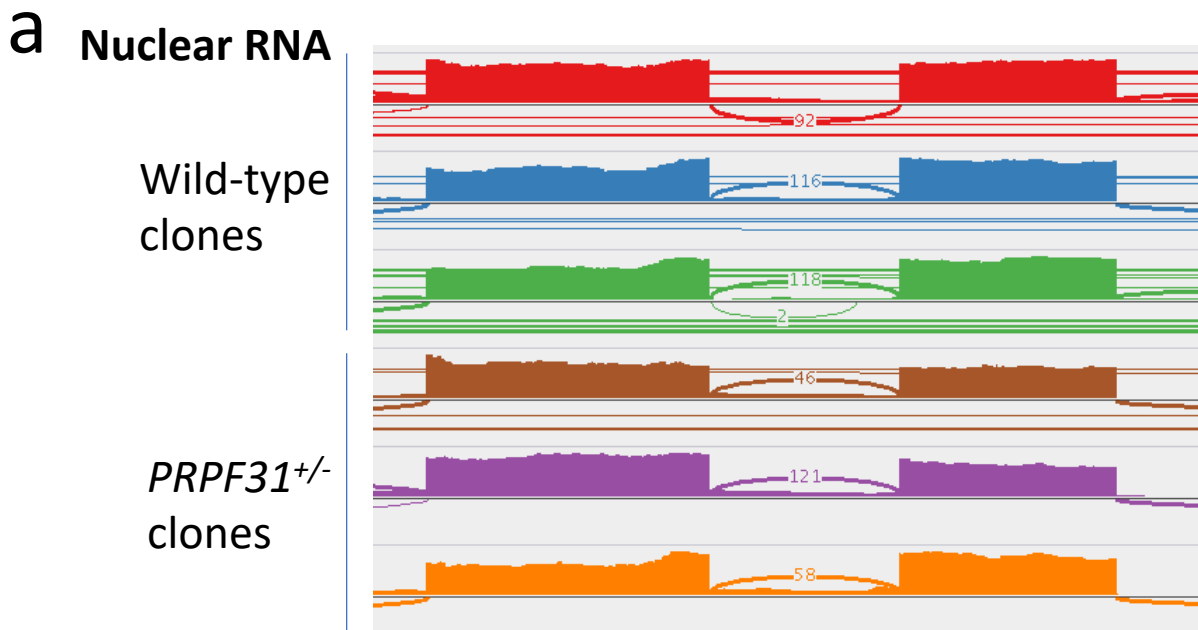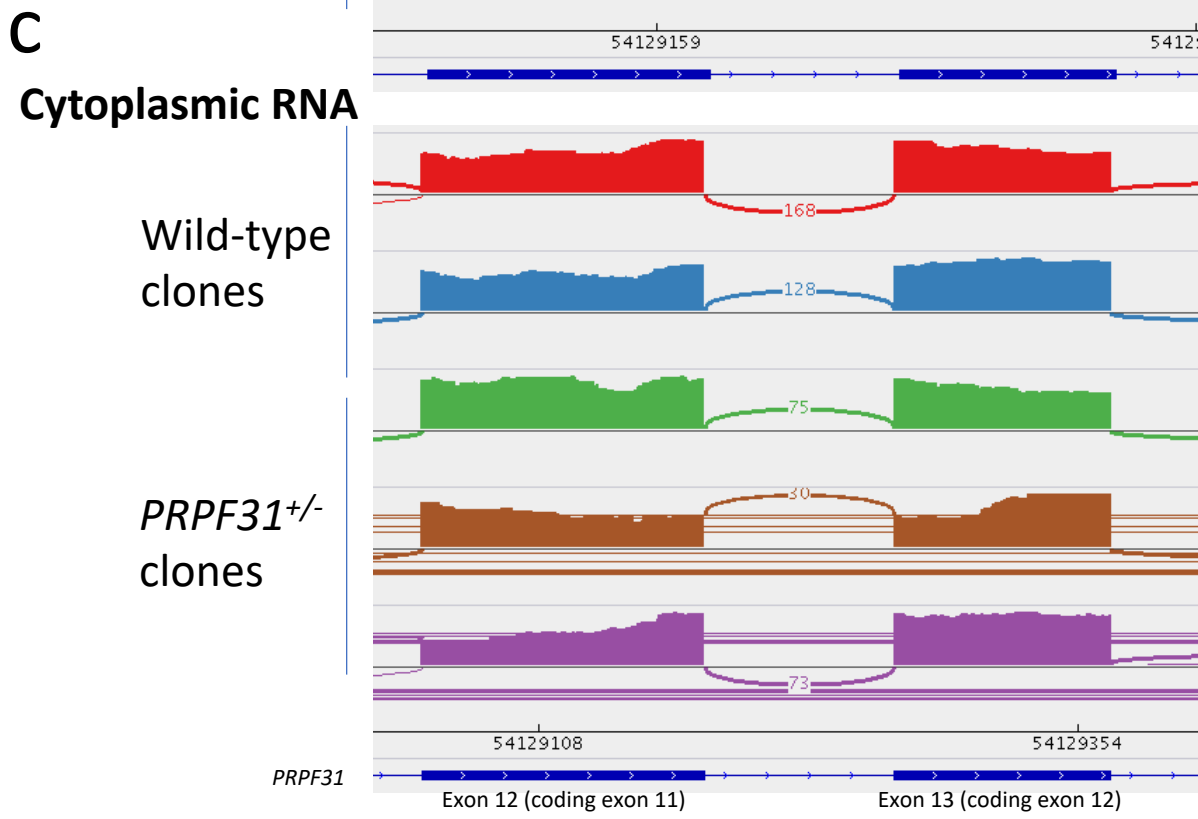

**b**

|      | PValue     | FDR        | Intron inclusion level, WT | Intron inclusion level, <i>PRPF31</i> <sup>+/-</sup> clones | Intron inclusion level difference |
|------|------------|------------|----------------------------|-------------------------------------------------------------|-----------------------------------|
| SJ   | 0.00011932 | 0.01405932 | 0.096,0.09,0.039           | 0.132,0.186,0.194                                           | -0.096                            |
| SJ+I | 0.0001194  | 0.00906623 | 0.096,0.09,0.038           | 0.132,0.185,0.193                                           | -0.095                            |

**d**

|      | PValue | FDR | Intron inclusion level, WT | Intron inclusion level, <i>PRPF31</i> <sup>+/-</sup> clones | Intron inclusion level difference |
|------|--------|-----|----------------------------|-------------------------------------------------------------|-----------------------------------|
| SJ   | 1      | 1   | 0.004,0.0                  | 0.009,0.0,0.0                                               | -0.001                            |
| SJ+I | 1      | 1   | 0.004,0.0                  | 0.009,0.0,0.0                                               | -0.001                            |

SJ = only reads mapping to splice junctions considered  
 SJ + I = reads mapping to splice junctions and to intron considered
